# Supplementary material
Source: ML conference proceedings conference paper supplement (https://proceedings.mlr.press/v48/oswal16.html)
Supplement: Supplementary file 1 [file oswal16-supp.pdf]

---

## Supplementary Material: Representational Similarity Learning

---

### 1. Extending methods to matrices that are not Positive Semi-Definite

For any symmetric  $S$  we have an eigendecomposition  $UDU^T$ , where the eigenvalues may be negative. We can think of  $W$  as having the form  $BDB^T$  for some  $B$  and using the  $D$  from  $S$ .

So we consider the following optimizations instead.

$$\min_B \|S - XBDBX^T\|_F^2,$$

and

$$\min_B \|U - XB\|_F^2.$$

Then given a  $B$  construct  $W = BDB^T$ . The rest remains the same.

### 2. Clustering properties of GrOWL with absolute error loss function

#### Proof of Theorem 3.1

*Proof.* The proof is divided into two steps. First, we show  $\|\hat{\beta}_j\| = \|\hat{\beta}_k\|$  and then we further show that the rows are equal. We proceed by contradiction. Assume  $\|\hat{\beta}_j\| \neq \|\hat{\beta}_k\|$  and, without loss of generality, suppose  $\|\hat{\beta}_j\| > \|\hat{\beta}_k\|$ . We see that there exists a modification of the solution with a smaller GrOWL norm and same data-fitting term, and thus smaller overall objective value which contradicts our assumption that  $\hat{B}$  is the minimizer of  $L(B) + G(B)$ .

Consider the modification,  $V = \hat{B}$  except  $\hat{v}_j = \hat{\beta}_j - \varepsilon$  and  $\hat{v}_k = \hat{\beta}_k + \varepsilon$  where  $\varepsilon = \delta \hat{\beta}_j$  and  $\delta$  is chosen such that  $\|\varepsilon\| \in (0, \frac{\|\hat{\beta}_j\| - \|\hat{\beta}_k\|}{2}]$

Let  $L(B) = \|Y - XB\|_1 = \|Y' - x_{.j}\hat{\beta}_j - x_{.k}\hat{\beta}_k\|_1$  where  $Y'$  is the residual term given by  $Y' = Y - \sum_{i \neq j,k} x_{.i}\hat{\beta}_i$ . Since  $x_{.j} = x_{.k}$ ,  $L$  is invariant under this transformation, i.e.,  $L(V) = L(\hat{B})$ . Same is true for  $L(B) = \|Y - XB\|_F^2$ .

Observe that the GrOWL norm of  $B$  is equal to the OWL norm of the vector of euclidean norms of rows of  $B$ . Since  $\|v_k\| = \|\beta_k + \varepsilon\| \leq \|\beta_k\| + \|\varepsilon\|$ , this transformation is equivalent to that defined in Lemma 3.1 and we have

$$G(\hat{B}) - G(V) \geq \Delta \|\varepsilon\|$$

This leads to a contradiction to our assumption that  $\hat{B}$  is the minimizer of  $L(B) + G(B)$  and completes the proof that  $\|\hat{\beta}_j\| = \|\hat{\beta}_k\|$ . Now, let  $\hat{\beta}_j + \hat{\beta}_k = z$ , then the minimizer satisfies

$$\min_{\hat{\beta}_j, \hat{\beta}_k} w_j \|\hat{\beta}_j\| + w_k \|\hat{\beta}_k\|$$

$$\text{such that } \hat{\beta}_j + \hat{\beta}_k = z \text{ and } \|\hat{\beta}_j\| = \|\hat{\beta}_k\|$$

It is easy to see that the solution to this optimization is  $\hat{\beta}_j = \hat{\beta}_k = z/2$   $\square$

#### Proof of Theorem 3.2

*Proof.* The proof is similar to the identical columns theorem. By contradiction and without loss of generality, suppose  $\|\hat{\beta}_j\| > \|\hat{\beta}_k\|$ . We show that there exists a transformation of  $\hat{B}$  such that the increase in the data fitting term is smaller than the decrease in the GrOWL norm.

Consider the modification,  $V$ , as defined in the proof of Theorem 3.1. By triangle inequality, the difference in loss function  $L$  that results from this modification satisfies

$$L(V) - L(\hat{B}) \leq \|x_{.j} - x_{.k}\|_1 \|\varepsilon\|_1$$

Invoking Lemma 3.1 as in the previous theorem and  $\|\varepsilon\|_1 \leq \sqrt{r} \|\varepsilon\|$ , we get

$$\begin{aligned} L(V) + G(V) - (L(\hat{B}) + G(\hat{B})) \\ \leq \sqrt{r} (\|x_{.j} - x_{.k}\|_1 - \frac{\Delta}{\sqrt{r}}) \|\varepsilon\| < 0 \end{aligned}$$

This contradicts our assumption that  $\hat{B}$  is the minimizer of  $L(B) + G(B)$  and completes the proof for absolute loss. The proof with squared Frobenius loss can easily be extended using the inequality derived in Appendix B.  $\square$

#### Proof of Theorem 3.3

*Proof.* The proof is similar to the identical columns theorem. By contradiction, suppose  $\|\hat{\beta}_j - \hat{\beta}_k\| \geq \frac{8\phi \|\hat{\beta}_k\|}{4\phi^2 + 1} \geq \frac{2\|\hat{\beta}_k\|}{\phi}$ . We show that there exists a transformation of  $\hat{B}$  such that the increase in the data fitting term is smaller than the decrease in the GrOWL norm.

Consider the modification,  $\mathbf{V}$ , as defined in the proof of Theorem 3.1 with  $\varepsilon = \frac{\hat{\beta}_j - \hat{\beta}_k}{2}$ . By triangle inequality, the difference in loss function  $L$  that results from this modification satisfies

$$L(\mathbf{V}) - L(\hat{\mathbf{B}}) \leq \|\mathbf{x}_{\cdot j} - \mathbf{x}_{\cdot k}\|_1 \|\varepsilon\|_1$$

We now bound the decrease in the GrOWL norm. Note by parallelogram law,

$$\begin{aligned} & \|\hat{\beta}_j + \hat{\beta}_k\|^2 \\ &= 2\|\hat{\beta}_j\|^2 + 2\|\hat{\beta}_k\|^2 - \|\hat{\beta}_j - \hat{\beta}_k\|^2 \\ &\leq 2\|\hat{\beta}_j\|^2 + 2\|\hat{\beta}_k\|^2 + \left(\frac{1}{4\phi^2} - \frac{1}{4\phi^2} - 1\right) \|\hat{\beta}_j - \hat{\beta}_k\|^2 \\ &\leq 4\|\hat{\beta}_j\|^2 + \left(\frac{\|\hat{\beta}_j - \hat{\beta}_k\|}{2\phi}\right)^2 - \frac{1 + 4\phi^2}{4\phi^2} \|\hat{\beta}_j - \hat{\beta}_k\|^2 \\ &\leq 4\|\hat{\beta}_j\|^2 + \left(\frac{\|\hat{\beta}_j - \hat{\beta}_k\|}{2\phi}\right)^2 - 2\frac{\|\hat{\beta}_j\| \|\hat{\beta}_j - \hat{\beta}_k\|}{\phi} \\ &\leq \left(\|\hat{\beta}_j\| + \|\hat{\beta}_k\| - \frac{\|\hat{\beta}_j - \hat{\beta}_k\|}{2\phi}\right)^2 \end{aligned}$$

Thus, we have

$$\begin{aligned} G(\hat{\mathbf{B}}) - G(\mathbf{V}) &\geq \Delta \left( \|\hat{\beta}_j\| + \|\hat{\beta}_k\| - \|\hat{\beta}_j + \hat{\beta}_k\| \right) \\ &\geq \frac{\Delta \|\hat{\beta}_j - \hat{\beta}_k\|}{2\phi} = \frac{\Delta \|\varepsilon\|}{\phi} \end{aligned}$$

Combining this with  $\|\varepsilon\|_1 \leq \sqrt{r} \|\varepsilon\|$ , we get

$$\begin{aligned} L(\mathbf{V}) + G(\mathbf{V}) - (L(\hat{\mathbf{B}}) + G(\hat{\mathbf{B}})) \\ \leq \left( \sqrt{r} \|\mathbf{x}_{\cdot j} - \mathbf{x}_{\cdot k}\|_1 - \frac{\Delta}{\phi} \right) \|\varepsilon\| < 0 \end{aligned}$$

This contradicts our assumption that  $\hat{\mathbf{B}}$  is the minimizer of  $L(\mathbf{B}) + G(\mathbf{B})$  and completes the proof for absolute loss. The proof with squared Frobenius loss can easily be extended using the inequality derived in Appendix B.  $\square$

### 3. Clustering properties of GrOWL with squared Frobenius loss function

In this section, we consider the optimization

$$\min_{\mathbf{X}} \|\mathbf{Y} - \mathbf{X}\mathbf{B}\|_F^2 + G(\mathbf{B}) \quad (1)$$

Here we derive an upper bound on the increase in the squared loss term after applying the transformation,  $\mathbf{V}$ . We assume that the columns of the matrix,  $\mathbf{X}$ , are normalized

to a common norm, *i.e.*, ( $\|\mathbf{x}_{\cdot i}\| = c$  for  $i = 1, \dots, p$ ). Define  $L(\mathbf{X}) = \|\mathbf{Y} - \mathbf{X}\mathbf{B}\|_F^2 = \|\mathbf{Y}' - \mathbf{x}_{\cdot j}\beta_j - \mathbf{x}_{\cdot k}\beta_k\|_F^2$  where  $\mathbf{Y}'$  is again the residual term.

**Lemma 1.** *Let  $\hat{\mathbf{B}} \in \mathbb{R}^{p \times r}$  and if  $\mathbf{V}$  is as defined in the respective theorems, then we have*

$$L(\mathbf{V}) - L(\hat{\mathbf{B}}) \leq \|\varepsilon\| \|\mathbf{Y}'\|_F \|\mathbf{x}_{\cdot j} - \mathbf{x}_{\cdot k}\|$$

*Proof.*

$$\begin{aligned} L(\mathbf{V}) - L(\hat{\mathbf{B}}) &= \frac{1}{2} \|\mathbf{Y}' - \mathbf{x}_{\cdot j}(\hat{\beta}_j - \varepsilon) - \mathbf{x}_{\cdot k}(\hat{\beta}_k + \varepsilon)\|_F^2 \\ &\quad - \frac{1}{2} \|\mathbf{Y}' - \mathbf{x}_{\cdot j}\hat{\beta}_j - \mathbf{x}_{\cdot k}\hat{\beta}_k\|_F^2 \end{aligned}$$

Expanding the Frobenius norm terms, canceling the common  $\frac{1}{2} \|\mathbf{Y}'\|_F^2$  terms and using the common norm of columns ( $\|\mathbf{x}_{\cdot i}\| = c$  for  $i = 1, \dots, p$ ) we get

$$\begin{aligned} L(\mathbf{V}) - L(\hat{\mathbf{B}}) &= \frac{c^2}{2} \text{tr}((\hat{\beta}_j - \varepsilon)(\hat{\beta}_j - \varepsilon)^T + (\hat{\beta}_k + \varepsilon)(\hat{\beta}_k + \varepsilon)^T \\ &\quad - \hat{\beta}_j \hat{\beta}_j^T - \hat{\beta}_k \hat{\beta}_k^T) + \text{tr}(\mathbf{Y}'^T (\mathbf{x}_{\cdot j} - \mathbf{x}_{\cdot k}) \varepsilon) \\ &\quad + \text{tr}((\hat{\beta}_j - \varepsilon) \mathbf{x}_{\cdot j}^T \mathbf{x}_{\cdot k} (\hat{\beta}_k + \varepsilon)^T - \hat{\beta}_j \mathbf{x}_{\cdot j}^T \mathbf{x}_{\cdot k} \hat{\beta}_k^T) \end{aligned}$$

Expanding terms and making further cancellations gives

$$\begin{aligned} L(\mathbf{V}) - L(\hat{\mathbf{B}}) &= \text{tr}(\mathbf{Y}'^T (\mathbf{x}_{\cdot j} - \mathbf{x}_{\cdot k}) \varepsilon) - (c^2 - \mathbf{x}_{\cdot j}^T \mathbf{x}_{\cdot k}) \text{tr}((\hat{\beta}_j - \hat{\beta}_k - \varepsilon) \varepsilon^T) \\ &\leq \text{tr}(\mathbf{Y}'^T (\mathbf{x}_{\cdot j} - \mathbf{x}_{\cdot k}) \varepsilon) \\ &\quad - (c^2 - \mathbf{x}_{\cdot j}^T \mathbf{x}_{\cdot k}) \|\varepsilon\| (\|\hat{\beta}_j\| - \|\hat{\beta}_k\| - \|\varepsilon\|) \\ &\leq \text{tr}(\mathbf{Y}'^T (\mathbf{x}_{\cdot j} - \mathbf{x}_{\cdot k}) \varepsilon^T) \\ &\leq \|\mathbf{Y}'\|_F \|(\mathbf{x}_{\cdot j} - \mathbf{x}_{\cdot k}) \varepsilon\|_F \\ &= \|\varepsilon\| \|\mathbf{Y}'\|_F \|\mathbf{x}_{\cdot j} - \mathbf{x}_{\cdot k}\| \end{aligned}$$

where the first inequality follows from simplification and Cauchy-Schwarz inequality. The second inequality follows from  $c^2 > \mathbf{x}_{\cdot j}^T \mathbf{x}_{\cdot k}$  and  $\|\hat{\beta}_j\|_2 - \|\hat{\beta}_k\|_2 - \|\varepsilon\| > 0$  (by assumption). The third inequality follows, again, by Cauchy-Schwarz inequality.  $\square$

Using this Lemma one can easily extend the clustering properties of GrOWL to the optimization in (1).

### 4. Proximal algorithms for GrOWL

*Proof.* Outline: the proof proceeds by finding a lower bound for the objective function in (5) and then we show that the proposed solution achieves this lower bound.

First, note that the following is true for any  $\mathbf{B}$  and  $\mathbf{V}$ ,

$$\begin{aligned}\|\mathbf{B} - \mathbf{V}\|_F^2 &= \sum_{i=1}^p \|\beta_{i\cdot} - \mathbf{v}_{i\cdot}\|^2 \\ &\geq \sum_{i=1}^p (\|\beta_{i\cdot}\| - \|\mathbf{v}_{i\cdot}\|)^2 = \|\tilde{\beta} - \tilde{\mathbf{v}}\|^2\end{aligned}$$

where the inequality follows from reverse triangle inequality.

Combining this with  $G(\mathbf{B}) = \Omega_{\mathbf{w}}(\tilde{\beta})$ , we have a lower bound on the objective function in (5). For all  $\mathbf{B} \in \mathbb{R}^{p \times r}$

$$\frac{1}{2}\|\mathbf{B} - \mathbf{V}\|_F^2 + G(\mathbf{B}) \geq \frac{1}{2}\|\text{prox}_{\Omega_{\mathbf{w}}}(\tilde{\mathbf{v}}) - \tilde{\mathbf{v}}\|^2 + \Omega_{\mathbf{w}}(\text{prox}_{\Omega_{\mathbf{w}}}(\tilde{\mathbf{v}}))$$

Finally, we show that  $\mathbf{B} = \hat{\mathbf{V}}$  achieves this lower bound,

$$\begin{aligned}&\frac{1}{2}\|\hat{\mathbf{V}} - \mathbf{V}\|_F^2 + G(\hat{\mathbf{V}}) \\ &= \frac{1}{2}\sum_{i=1}^p \left\| \left( \text{prox}_{\Omega_{\mathbf{w}}}(\tilde{\mathbf{v}}) \right)_i \frac{\mathbf{v}_{i\cdot}}{\|\mathbf{v}_{i\cdot}\|} - \mathbf{v}_{i\cdot} \right\|_2^2 + \Omega_{\mathbf{w}}(\text{prox}_{\Omega_{\mathbf{w}}}(\tilde{\mathbf{v}})) \\ &= \frac{1}{2}\|\text{prox}_{\Omega_{\mathbf{w}}}(\tilde{\mathbf{v}}) - \tilde{\mathbf{v}}\|_2^2 + \Omega_{\mathbf{w}}(\text{prox}_{\Omega_{\mathbf{w}}}(\tilde{\mathbf{v}}))\end{aligned}$$

□
